# Supplementary material for: How did that interaction make you feel? The relationship between quality of everyday social experiences and emotion in people with and without schizophrenia
Source: PLoS One. 2019 Sep 30;14(9):e0223003. doi: 10.1371/journal.pone.0223003 (PMC6768461; doi:10.1371/journal.pone.0223003)
Supplement: S1 File — Ecological momentary assessment data. (CSV) [file pone.0223003.s001.csv]

Subject_ID	Group	Day	Time_of_day	Timepoint	Happy	Sad	Anxious	WellKnow	MuchInt	MuchEnjoyInteraction	NumberEMAInteractions	Alone	HappyWithOthers	AnxiousWithOthers	SadWithOthers
618	1	1	1	1	4	0	1				3	1
618	1	1	2	2	4	0	1				2	1
618	1	1	3	3	4	0	1				1	1
618	1	2	1	4	4	0	1				0	1
618	1	2	2	5	4	0	1				0	1
618	1	2	3	6	4	0	2				1	1
618	1	3	1	7	4	0	3				1	1
618	1	3	2	8	4	0	0				1	1
618	1	3	3	9	4	0	1				1	1
618	1	4	1	10	3	0	1				1	1
618	1	4	2	11	4	0	1	2	3	4	1	0	4	1	0
618	1	4	3	12	4	0	1				2	1
618	1	5	1	13
618	1	5	2	14	4	0	1				0	1
618	1	5	3	15	4	0	1				1	1
618	1	6	1	16
618	1	6	2	17	4	0	1				3	1
618	1	6	3	18	4	0	1				1	1
618	1	7	1	19	4	0	1				2	1
618	1	7	2	20	4	0	1				1	1
618	1	7	3	21	4	0	1	2	2	4	3	0	4	1	0
626	1	1	1	1
626	1	1	2	2	2	2	0				0	1
626	1	1	3	3	4	1	0				2	1
626	1	2	1	4	1	2	2				0	1
626	1	2	2	5	3	0	0				0	1
626	1	2	3	6
626	1	3	1	7
626	1	3	2	8	2	0	0				1	1
626	1	3	3	9	2	0	0				1	1
626	1	4	1	10
626	1	4	2	11
626	1	4	3	12
626	1	5	1	13	3	0	1				0	1
626	1	5	2	14
626	1	5	3	15
626	1	6	1	16
626	1	6	2	17	3	0	0				2	1
626	1	6	3	18	1	0	3				0	1
626	1	7	1	19
626	1	7	2	20	0	0	0				0	1
626	1	7	3	21	1	0	0				0	1
636	1	1	1	1	2	0	2	1	4	2	0	0	2	2	0
636	1	1	2	2	3	0	1				3	1
636	1	1	3	3	1	2	5				1	1
636	1	2	1	4	0	1	1	1	1	0	3	0	0	1	1
636	1	2	2	5	2	1	2		1	1	3	0	2	2	1
636	1	2	3	6	1	2	0				2	1
636	1	3	1	7	1	2	0				3	1
636	1	3	2	8	2	0	1				3	1
636	1	3	3	9	2	1	0				2	1
636	1	4	1	10	3	1	2				1	1
636	1	4	2	11	0	2	2				3	1
636	1	4	3	12	0	2	1				2	1
636	1	5	1	13	2	2	2	0	0		3	0	2	2	2
636	1	5	2	14	2	2	1	2	2	2	3	0	2	1	2
636	1	5	3	15	2	1	1	2	1	2	3	1
636	1	6	1	16	2	0	2	2	2	1	3	0	2	2	0
636	1	6	2	17	2	1	0				3	1
636	1	6	3	18	0	2	1				3	1
636	1	7	1	19	0	2	2	0	0		3	0	0	2	2
636	1	7	2	20	2	2	2				3	1
636	1	7	3	21	2	0	0	2	2	3	3	1
8016	0	1	1	1
8016	0	3	1	1	4	0	1	0	0		1	0	4	1	0
8016	0	1	2	2	5	0	2	0	1	0	0	0	5	2	0
8016	0	1	3	3	5	5	0	3	4	4	1	0	5	0	5
8016	0	2	1	4
8016	0	2	2	5	5	0	1	1	3	4	3	0	5	1	0
8016	0	2	3	6	3	3	1	0	0		2	0	3	1	3
8016	0	3	2	8	5	0	1				1	1
8016	0	3	3	9	3	0	0				1	1
8016	0	4	1	10	3	0	0				1	1
8016	0	4	2	11	4	1	3	1	0		0	0	4	3	1
8016	0	4	3	12	3	2	0				2	1
8016	0	5	1	13
8016	0	5	2	14	5	0	1				1	1
8016	0	5	3	15	5	2	0	2	4	4	2	0	5	0	2
8016	0	6	1	16	5	0	5				1	1
8016	0	6	2	17	5	0	0				1	1
8016	0	6	3	18	5	2	0	0	0			0	5	0	2
8016	0	7	1	19	5	0	0				2	1
8016	0	7	2	20	5	0	0				2	1
8016	0	7	3	21	5	0	0				2	1
8043	0	1	1	1	4	4	3	2	3	3	2	1
8043	0	1	2	2	3	2	3	1	2	0	2	1
8043	0	1	3	3	3	4	1	0	1	1	2	0	3	1	4
8043	0	2	1	4	1	1	2	1	3	2	1	1
8043	0	2	2	5
8043	0	2	3	6	3	3	3	1	3	1	0	1
8043	0	3	1	7	2	3	0	1	0		1	1
8043	0	3	2	8
8043	0	3	3	9	2	2	2	1	2	1	1	0	2	2	2
8043	0	4	1	10
8043	0	4	2	11	2	2	1				1	1
8043	0	4	3	12
8043	0	5	1	13	2	2	1	1	1	1	2	1
8043	0	5	2	14
8043	0	5	3	15	2	4	1	0	2	2	2	0	2	1	4
8043	0	6	1	16	1	2	2	1	0		1	1
8043	0	6	2	17
8043	0	6	3	18	2	2	1				2	1
8043	0	7	1	19	3	2	2	1	2	1	0	1
8043	0	7	2	20
8043	0	7	3	21	3	2	1				2	1
8046	0	1	1	1
8046	0	1	2	2	3	0	2				2	1
8046	0	1	3	3	3	0	0				0	1
8046	0	2	1	4
8046	0	2	2	5
8046	0	2	3	6	2	0	2				0	1
8046	0	3	1	7	2	0	2	1	2	1	1	0	2	2	0
8046	0	3	2	8
8046	0	3	3	9	5	5	2	2	5	4	3	0	5	2	5
8046	0	4	1	10	4	0	3	1	5	5	3	0	4	3	0
8046	0	4	2	11	3	0	0	1	3	2	2	0	3	0	0
8046	0	4	3	12	1	2	2				0	1
8046	0	5	1	13	2	1	2	1	2	2	1	0	2	2	1
8046	0	5	2	14	4	0	2				3	1
8046	0	5	3	15	2	0	2				1	1
8046	0	6	1	16	2	0	1	0	0		0	0	2	1	0
8046	0	6	2	17	4	0	0	0	5	4	1	0	4	0	0
8046	0	6	3	18	3	3	2	1	2	1	1	0	3	2	3
8046	0	7	1	19	2	0	1				0	1
8046	0	7	2	20	3	0	0				0	1
8046	0	7	3	21
8047	0	1	1	1	4	0	1	2	4	4	3	0	4	1	0
8047	0	1	2	2
8047	0	1	3	3
8047	0	2	1	4	3	0	1	0	2	3	1	0	3	1	0
8047	0	2	2	5
8047	0	2	3	6
8047	0	3	1	7	3	0	1	2	0		1	0	3	1	0
8047	0	3	2	8	4	0	1	2	4	4	3	0	4	1	0
8047	0	3	3	9	4	0	1	2	0		2	1
8047	0	4	1	10
8047	0	4	2	11
8047	0	4	3	12
8047	0	5	1	13	3	0	1	2	4	4	3	1
8047	0	5	2	14	2	0	2	2	3	2	2	1
8047	0	5	3	15	3	0	1	1	1	2	0	1
8047	0	6	1	16
8047	0	6	2	17
8047	0	6	3	18	4	0	1				2	1
8047	0	7	1	19
8047	0	7	2	20
8047	0	7	3	21
8053	0	1	1	1	2	0	0				1	1
8053	0	1	2	2	3	0	1	1	2	2	3	0	3	1	0
8053	0	1	3	3	3	0	1				3	1
8053	0	2	1	4	2	0	0				3	1
8053	0	2	2	5
8053	0	2	3	6
8053	0	3	1	7	3	0	0				3	1
8053	0	3	2	8	3	0	0				2	1
8053	0	3	3	9	2	0	0				0	1
8053	0	4	1	10	3	0	0	3	4	3	3	0	3	0	0
8053	0	4	2	11	2	0	0				3	1
8053	0	4	3	12	3	0	0				2	1
8053	0	5	1	13	3	0	0				2	1
8053	0	5	2	14	3	0	0				2	1
8053	0	5	3	15	2	0	0				1	1
8053	0	6	1	16	2	0	0				2	1
8053	0	6	2	17	2	0	0				3	1
8053	0	6	3	18	2	0	1				2	1
8053	0	7	1	19	2	0	0				3	1
8053	0	7	2	20	2	0	0	0	1	2	3	0	2	0	0
8053	0	7	3	21	3	0	0	2	3	3	3	0	3	0	0
8055	0	1	1	1	3	0	1	2	0		1	1
8055	0	1	2	2	1	0	0	2	2	2	3	0	1	0	0
8055	0	1	3	3	3	0	0	2	0		2	0	3	0	0
8055	0	2	1	4	3	0	0	2	4	3	2	0	3	0	0
8055	0	2	2	5	5	0	0	2	5	5	3	0	5	0	0
8055	0	2	3	6
8055	0	3	1	7
8055	0	3	2	8
8055	0	3	3	9	1	0	0					1
8055	0	4	1	10	1	1	0	2	2	1	1	0	1	0	1
8055	0	4	2	11	1	0	1	0	0		1	0	1	1	0
8055	0	4	3	12
8055	0	5	1	13	1	0	2	2	0		3	1
8055	0	5	2	14	3	0	0				1	1
8055	0	5	3	15	0	0	2	0	0		2	0	0	2	0
8055	0	6	1	16
8055	0	6	2	17
8055	0	6	3	18	0	0	1	2	0		2	1
8055	0	7	1	19
8055	0	7	2	20	3	0	3	2	0		2	1
8055	0	7	3	21	1	0	2				1	1
8056	0	1	1	1
8056	0	1	2	2	3	1	2	0	2	0	1	0	3	2	1
8056	0	1	3	3
8056	0	2	1	4
8056	0	2	2	5	4	1	2	0	2	4	3	0	4	2	1
8056	0	2	3	6	4	1	2				3	1
8056	0	3	1	7	3	1	4				2	1
8056	0	3	2	8	3	1	1	1	2	4	2	0	3	1	1
8056	0	3	3	9	4	1	2	2	5	5	1	0	4	2	1
8056	0	4	1	10
8056	0	4	2	11
8056	0	4	3	12
8056	0	5	1	13	4	1	1				2	1
8056	0	5	2	14
8056	0	5	3	15
8056	0	6	1	16
8056	0	6	2	17	3	1	1				0	1
8056	0	6	3	18	4	1	1				0	1
8056	0	7	1	19
8056	0	7	2	20
8056	0	7	3	21	4	1	2	0	1	4	3	0	4	2	1
8057	0	1	1	1	3	0	0				0	1
8057	0	1	2	2	3	1	0				0	1
8057	0	1	3	3	4	0	0				1	1
8057	0	2	1	4	3	0	0				0	1
8057	0	2	2	5	3	0	0				0	1
8057	0	2	3	6	2	2	0				0	1
8057	0	3	1	7	2	1	1	0	0		1	0	2	1	1
8057	0	3	2	8
8057	0	3	3	9
8057	0	4	1	10	3	0	0				1	1
8057	0	4	2	11
8057	0	4	3	12	3	0	0				0	1
8057	0	5	1	13	2	0	2	0	0		2	0	2	2	0
8057	0	5	2	14
8057	0	5	3	15	3	0	2				2	1
8057	0	6	1	16
8057	0	6	2	17	2	1	1				1	1
8057	0	6	3	18
8057	0	7	1	19	4	0	0				3	1
8057	0	7	2	20	3	0	1	0	1	1	3	0	3	1	0
8057	0	7	3	21	3	0	0				0	1
8058	0	1	1	1
8058	0	1	2	2
8058	0	1	3	3	3	0	0	3	1	3	2	0	3	0	0
8058	0	2	1	4	2	0	0				1	1
8058	0	2	2	5	2	0	0				2	1
8058	0	2	3	6	2	0	1	3	0		2	1
8058	0	3	1	7
8058	0	3	2	8	1	0	0	1	1	1	3	0	1	0	0
8058	0	3	3	9	3	0	0	3	0		2	1
8058	0	4	1	10	3	0	0				2	1
8058	0	4	2	11	3	0	0	3	0		2	1
8058	0	4	3	12	3	0	0	3	0		2	1
8058	0	5	1	13	3	0	0				2	1
8058	0	5	2	14	2	0	0	3	1	3	2	1
8058	0	5	3	15	3	0	0	3	1	3	2	1
8058	0	6	1	16	4	0	0	3	0		2	0	4	0	0
8058	0	6	2	17	2	0	0	3	1	2	2	1
8058	0	6	3	18	3	0	0	3	0		2	1
8058	0	7	1	19	4	0	0				3	1
8058	0	7	2	20	2	0	0	3	1	4	2	1
8058	0	7	3	21	3	0	0	3	0		2	1
8061	0	1	1	1
8061	0	1	2	2	3	0	0				2	1
8061	0	1	3	3	3	0	0	3	4	4	2	0	3	0	0
8061	0	2	1	4	3	0	0				1	1
8061	0	2	2	5	3	0	0				2	1
8061	0	2	3	6	2	0	0				1	1
8061	0	3	1	7	2	0	0				2	1
8061	0	3	2	8
8061	0	3	3	9	3	0	0	1	4	4	2	0	3	0	0
8061	0	4	1	10	4	0	0	1	4	4	1	0	4	0	0
8061	0	4	2	11	2	0	0	1	4	4	2	0	2	0	0
8061	0	4	3	12	2	0	0				2	1
8061	0	5	1	13	3	0	0				2	1
8061	0	5	2	14	2	0	0				1	1
8061	0	5	3	15	4	0	0				0	1
8061	0	6	1	16	2	0	0				2	1
8061	0	6	2	17	3	0	0	2	4	4	2	0	3	0	0
8061	0	6	3	18	3	0	0	2	4	4	2	0	3	0	0
8061	0	7	1	19	2	0	0				2	1
8061	0	7	2	20	3	0	0				2	1
8061	0	7	3	21
8062	0	1	1	1	4	0	0				3	1
8062	0	1	2	2	4	0	0				2	1
8062	0	1	3	3	4	0	0				3	1
8062	0	2	1	4	4	0	0				0	1
8062	0	2	2	5	3	0	0				3	1
8062	0	2	3	6	3	0	0				3	1
8062	0	3	1	7	3	0	0	0	5	3	1	0	3	0	0
8062	0	3	2	8	3	0	0				2	1
8062	0	3	3	9	4	0	0				2	1
8062	0	4	1	10	4	0	0				2	1
8062	0	4	2	11
8062	0	4	3	12	4	0	0				2	1
8062	0	5	1	13	3	0	2				2	1
8062	0	5	2	14	5	0	0				2	1
8062	0	5	3	15	3	0	0				2	1
8062	0	6	1	16	5	0	0				3	1
8062	0	6	2	17	4	0	0				0	1
8062	0	6	3	18	4	0	0				2	1
8062	0	7	1	19	5	5	0	0	5	4	2	0	5	0	5
8062	0	7	2	20	4	0	0				2	1
8062	0	7	3	21	4	4	0				2	1
8063	0	1	1	1	5	0	0				0	1
8063	0	1	2	2
8063	0	1	3	3	5	0	0				1	1
8063	0	2	1	4	5	0	0	1	1	0	3	0	5	0	0
8063	0	2	2	5
8063	0	2	3	6
8063	0	3	1	7
8063	0	3	2	8	5	0	0	2	2	5	3	0	5	0	0
8063	0	3	3	9	5	0	0	3	5	5	3	0	5	0	0
8063	0	4	1	10	5	0	0				3	1
8063	0	4	2	11	5	0	0				3	1
8063	0	4	3	12
8063	0	5	1	13
8063	0	5	2	14
8063	0	5	3	15	5	0	0	2	5	5	3	0	5	0	0
8063	0	6	1	16
8063	0	6	2	17	5	0	0	2	5	5	3	0	5	0	0
8063	0	6	3	18
8063	0	7	1	19
8063	0	7	2	20
8063	0	7	3	21
8064	0	1	1	1	3	3	0				2	1
8064	0	1	2	2	4	0	0	3	2	4	2	1
8064	0	1	3	3	4	0	0	2	4	4	3	0	4	0	0
8064	0	2	1	4	4	1	1	3	4	2	3	1
8064	0	2	2	5	4	0	1				2	1
8064	0	2	3	6
8064	0	3	1	7	3	0	0	1	1	2	2	0	3	0	0
8064	0	3	2	8
8064	0	3	3	9	2	3	1	1	0		2	0	2	1	3
8064	0	4	1	10	3	0	0	1	0		2	0	3	0	0
8064	0	4	2	11	2	2	2	1	1	1	1	0	2	2	2
8064	0	4	3	12
8064	0	5	1	13	4	0	0	1	0		2	0	4	0	0
8064	0	5	2	14	4	0	0	1	1	3	2	0	4	0	0
8064	0	5	3	15	4	0	0				1	1
8064	0	6	1	16	4	0	2	1	0		1	0	4	2	0
8064	0	6	2	17
8064	0	6	3	18	3	0	0	0	0		1	0	3	0	0
8064	0	7	1	19	4	0	0	1	1	3	1	0	4	0	0
8064	0	7	2	20	3	0	0	1	0		0	0	3	0	0
8064	0	7	3	21	4	3	0				2	1
8606	0	1	1	1	5	0	0	3	4	4	2	0	5	0	0
8606	0	1	2	2	5	0	0				3	1
8606	0	1	3	3	4	0	0				2	1
8606	0	2	1	4	4	0	0	2	3	4	3	1
8606	0	2	2	5	4	0	0	3	1	4	2	1
8606	0	2	3	6	4	0	1				2	1
8606	0	3	1	7
8606	0	3	2	8	3	0	1	2	3	4	3	0	3	1	0
8606	0	3	3	9	4	0	1	2	3	4	3	0	4	1	0
8606	0	4	1	10	4	0	0				3	1
8606	0	4	2	11	3	0	1	2	2	3	3	0	3	1	0
8606	0	4	3	12	3	1	1				3	1
8606	0	5	1	13
8606	0	5	2	14
8606	0	5	3	15	4	0	0				3	1
8606	0	6	1	16	5	0	0	1	3	4	3	0	5	0	0
8606	0	6	2	17	4	0	0	2	2	3	3	0	4	0	0
8606	0	6	3	18	4	0	0	2	4	5	3	0	4	0	0
8606	0	7	1	19
8606	0	7	2	20	4	0	1	2	4	4	3	0	4	1	0
8606	0	7	3	21	4	0	1	0	1	3	3	0	4	1	0
8607	0	1	1	1
8607	0	1	2	2
8607	0	1	3	3	3	1	1	0	2	3	3	0	3	1	1
8607	0	2	1	4	3	1	0				1	1
8607	0	2	2	5
8607	0	2	3	6	5	2	0	2	4	4	1	0	5	0	2
8607	0	3	1	7
8607	0	3	2	8	2	3	1	2	3	4	1	0	2	1	3
8607	0	3	3	9
8607	0	4	1	10
8607	0	4	2	11
8607	0	4	3	12	2	2	2				1	1
8607	0	5	1	13
8607	0	5	2	14	3	2	3				2	1
8607	0	5	3	15
8607	0	6	1	16
8607	0	6	2	17
8607	0	6	3	18
8607	0	7	1	19
8607	0	7	2	20
8607	0	7	3	21
9053	1	1	1	1
9053	1	1	2	2	3	4	2	2	4	4		0	3	2	4
9053	1	1	3	3
9053	1	2	1	4	3	0	0	2	4	2	3	0	3	0	0
9053	1	2	2	5
9053	1	2	3	6	4	3	0	3	4	4	2	0	4	0	3
9053	1	3	1	7	4	0	1	3	2	4	1	0	4	1	0
9053	1	3	2	8
9053	1	3	3	9
9053	1	4	1	10	4	0	0	2	3	3	2	1
9053	1	4	2	11	5	0	0	2	4	3	3	0	5	0	0
9053	1	4	3	12	3	0	0	2	3	2	2	0	3	0	0
9053	1	5	1	13	3	0	4	2	2	5	1	1
9053	1	5	2	14	3	0	0				2	1
9053	1	5	3	15
9053	1	6	1	16	5	0	0	3	2	4	2	1
9053	1	6	2	17
9053	1	6	3	18	4	0	0				3	0	4	0	0
9053	1	7	1	19	5	3	0	1	4	5	2	0	5	0	3
9053	1	7	2	20
9053	1	7	3	21
9054	1	1	1	1
9054	1	1	2	2
9054	1	1	3	3
9054	1	2	1	4
9054	1	2	2	5	4	0	0	2	4	5	2	0	4	0	0
9054	1	2	3	6
9054	1	3	1	7	4	0	0				2	1
9054	1	3	2	8	5	0	4	3	4	5	2	0	5	4	0
9054	1	3	3	9	5	0	0	3	2	4	2	1
9054	1	4	1	10
9054	1	4	2	11	5	0	1	3	3	5		0	5	1	0
9054	1	4	3	12	5	0	0	2	5	4	1	0	5	0	0
9054	1	5	1	13	4	2	0	3	1	4	1	1
9054	1	5	2	14	3	2	5	2	2	4	2	1
9054	1	5	3	15	3	1	0	2	0		1	1
9054	1	6	1	16
9054	1	6	2	17
9054	1	6	3	18
9054	1	7	1	19	4	0	1	2	2	3	2	0	4	1	0
9054	1	7	2	20
9054	1	7	3	21
9058	1	1	1	1	4	0	0	1	1	3	3	0	4	0	0
9058	1	1	2	2
9058	1	1	3	3	3	0	0	2	2	3	3	0	3	0	0
9058	1	2	1	4	4	0	0	0	3	3	3	0	4	0	0
9058	1	2	2	5	4	0	0	2	0		3	1
9058	1	2	3	6	4	0	0	2	0		3	0	4	0	0
9058	1	3	1	7	3	0	0	2	1	3	3	1
9058	1	3	2	8	3	0	0	2	1	1	2	0	3	0	0
9058	1	3	3	9	4	0	0	2	0		3	0	4	0	0
9058	1	4	1	10	5	0	0	3	3	5	3	0	5	0	0
9058	1	4	2	11	3	0	0	3	2	3	2	0	3	0	0
9058	1	4	3	12	4	0	0	3	0		3	0	4	0	0
9058	1	5	1	13	5	0	0	3	2	4	1	0	5	0	0
9058	1	5	2	14	5	0	1	0	0		2	0	5	1	0
9058	1	5	3	15	3	0	0	3	0		3	0	3	0	0
9058	1	6	1	16	3	0	0	3	2	3	3	0	3	0	0
9058	1	6	2	17	4	0	0	3	4	4	2	0	4	0	0
9058	1	6	3	18	3	0	0	3	0		2	0	3	0	0
9058	1	7	1	19	4	0	0				3	1
9058	1	7	2	20
9058	1	7	3	21
9081	1	1	1	1	3	2	1				1	1
9081	1	1	2	2	0	1	1				2	1
9081	1	1	3	3	3	1	0				1	1
9081	1	2	1	4	3	1	3				1	1
9081	1	2	2	5	4	0	5				3	1
9081	1	2	3	6
9081	1	3	1	7	2	1	1				2	1
9081	1	3	2	8	1	3	2	1	0		3	0	1	2	3
9081	1	3	3	9	4	0	0				3	1
9081	1	4	1	10	4	4	0				3	1
9081	1	4	2	11	1	2	2	1	3	4	3	0	1	2	2
9081	1	4	3	12	3	1	0				2	1
9081	1	5	1	13
9081	1	5	2	14
9081	1	5	3	15	1	4	1				3	1
9081	1	6	1	16
9081	1	6	2	17
9081	1	6	3	18
9081	1	7	1	19	0	4	4				1	1
9081	1	7	2	20	1	2	4				1	1
9081	1	7	3	21	3	4	0				0	1
9090	1	1	1	1
9090	1	1	2	2	2	3	4				2	1
9090	1	1	3	3	3	2	3					0	3	3	2
9090	1	2	1	4
9090	1	2	2	5	4	2	3	3	4	3	1	0	4	3	2
9090	1	2	3	6	4	2	3	2	2	3	2	1
9090	1	3	1	7
9090	1	3	2	8
9090	1	3	3	9
9090	1	4	1	10	4	2	3	1	3	4		0	4	3	2
9090	1	4	2	11	4	2	2	2	1	3	2	1
9090	1	4	3	12
9090	1	5	1	13
9090	1	5	2	14	5	3	3		1	3	2	0	5	3	3
9090	1	5	3	15	4	3	2	1	2	3	1	0	4	2	3
9090	1	6	1	16
9090	1	6	2	17
9090	1	6	3	18
9090	1	7	1	19	4	2	3	3	4	3	2	0	4	3	2
9090	1	7	2	20
9090	1	7	3	21
9091	1	1	1	1	4	0	1	1	4	3	0	0	4	1	0
9091	1	1	2	2
9091	1	1	3	3
9091	1	2	1	4
9091	1	2	2	5
9091	1	2	3	6	3	0	1	2	1	3	2	1
9091	1	3	1	7	2	0	1				1	1
9091	1	3	2	8	2	0	0				1	1
9091	1	3	3	9	2	0	1	2	1	1	2	1
9091	1	4	1	10	3	0	0	2	2	3	2	0	3	0	0
9091	1	4	2	11	3	0	0				1	1
9091	1	4	3	12	4	0	0				2	1
9091	1	5	1	13	3	0	0	2	5	2	1	1
9091	1	5	2	14	1	0	0	2	0		2	0	1	0	0
9091	1	5	3	15	2	0	0	2	0		0	1
9091	1	6	1	16	3	0	0	2	2	3	3	0	3	0	0
9091	1	6	2	17
9091	1	6	3	18	0	0	0				0	1
9091	1	7	1	19	1	0	0				1	1
9091	1	7	2	20	1	0	0	2	3	3	2	0	1	0	0
9091	1	7	3	21	0	0	0	2	1	2	2	0	0	0	0
9092	1	1	1	1	3	0	2				0	1
9092	1	1	2	2	3	0	2				2	1
9092	1	1	3	3
9092	1	2	1	4	2	1	1				3	1
9092	1	2	2	5	3	0	2				1	1
9092	1	2	3	6
9092	1	3	1	7
9092	1	3	2	8
9092	1	3	3	9	3	0	2				1	1
9092	1	4	1	10
9092	1	4	2	11
9092	1	4	3	12	1	1	2				3	1
9092	1	5	1	13
9092	1	5	2	14	2	1	2				3	1
9092	1	5	3	15	2	1	1				0	1
9092	1	6	1	16	3	0	2				3	1
9092	1	6	2	17	3	1	2				2	1
9092	1	6	3	18	3	1	2				1	1
9092	1	7	1	19	3	0	2				2	1
9092	1	7	2	20
9092	1	7	3	21
9093	1	1	1	1	3	2	2				0	1
9093	1	1	2	2
9093	1	1	3	3	0	1	1	3	4	4	3	0	0	1	1
9093	1	2	1	4
9093	1	2	2	5	3	0	1				2	1
9093	1	2	3	6	4	0	0	3	4	4	2	1
9093	1	3	1	7	4	0	0	2	5	4	2	0	4	0	0
9093	1	3	2	8	3	0	0					1
9093	1	3	3	9
9093	1	4	1	10	2	0	1	1	0		1	0	2	1	0
9093	1	4	2	11	0	4	1					0	0	1	4
9093	1	4	3	12	4	0	0				1	1
9093	1	5	1	13	4	0	0	1	2	4	2	0	4	0	0
9093	1	5	2	14	3	0	0	1	1	3	3	0	3	0	0
9093	1	5	3	15	3	0	0	1	4	4	3	0	3	0	0
9093	1	6	1	16	1	0	2				2	1
9093	1	6	2	17	2	0	0	0	0		1	0	2	0	0
9093	1	6	3	18
9093	1	7	1	19	3	0	0				0	1
9093	1	7	2	20	2	1	1				2	1
9093	1	7	3	21	3	0	0	1	4	4	1	0	3	0	0
9094	1	1	1	1	3	0	1				3	1
9094	1	1	2	2	3	1	1				3	1
9094	1	1	3	3	3	0	0				2	1
9094	1	2	1	4
9094	1	2	2	5	2	2	1	1	3	3	3	0	2	1	2
9094	1	2	3	6	2	1	1	1	0		3	1
9094	1	3	1	7	2	1	1				3	1
9094	1	3	2	8	2	0	0				1	1
9094	1	3	3	9	2	0	0	1	1	3	3	1
9094	1	4	1	10	1	2	0				3	1
9094	1	4	2	11	2	0	0				3	1
9094	1	4	3	12	2	1	1	1	1	1	2	1
9094	1	5	1	13	2	1	0	1	1	3	3	1
9094	1	5	2	14	2	2	1	1	0		2	1
9094	1	5	3	15	2	2	1	1	1	3	2	1
9094	1	6	1	16	2	2	1				2	1
9094	1	6	2	17
9094	1	6	3	18	1	2	1	1	0		1	1
9094	1	7	1	19	2	1	1	1	0		3	1
9094	1	7	2	20
9094	1	7	3	21	3	1	2	1	1	2	2	1
9095	1	1	1	1
9095	1	1	2	2	1	0	1	0	0		3	0	1	1	0
9095	1	1	3	3
9095	1	2	1	4
9095	1	2	2	5
9095	1	2	3	6	1	0	1				3	1
9095	1	3	1	7
9095	1	3	2	8	1	0	1				3	1
9095	1	3	3	9
9095	1	4	1	10
9095	1	4	2	11	0	4	0				3	1
9095	1	4	3	12
9095	1	5	1	13
9095	1	5	2	14	0	5	0				0	1
9095	1	5	3	15
9095	1	6	1	16
9095	1	6	2	17
9095	1	6	3	18	0	0	0				3	1
9095	1	7	1	19
9095	1	7	2	20	1	0	0	1	1	1	3	0	1	0	0
9095	1	7	3	21	0	0	0				2	1
9096	1	1	1	1	2	3	1				3	1
9096	1	1	2	2	4	0	1	1	2	2	1	1
9096	1	1	3	3	3	0	0	0	2	2	2	0	3	0	0
9096	1	2	1	4	3	0	0	0	0		2	0	3	0	0
9096	1	2	2	5	3	1	1	1	3	3	3	0	3	1	1
9096	1	2	3	6	2	0	1	0	0		2	0	2	1	0
9096	1	3	1	7	2	0	0	1	2	2	2	0	2	0	0
9096	1	3	2	8	3	2	1	1	0		2	1
9096	1	3	3	9	3	0	0	1	2	2	2	0	3	0	0
9096	1	4	1	10	3	0	1	1	2	1	2	0	3	1	0
9096	1	4	2	11	3	1	1	1	1	2	2	0	3	1	1
9096	1	4	3	12	4	0	0	1	3	3	2	0	4	0	0
9096	1	5	1	13
9096	1	5	2	14	3	0	0	1	1	2	2	1
9096	1	5	3	15	3	0	0	1	1	2	2	1
9096	1	6	1	16	3	0	0	1	0		2	1
9096	1	6	2	17
9096	1	6	3	18	4	0	0	1	0		0	1
9096	1	7	1	19	1	1	2	1	0		3	0	1	2	1
9096	1	7	2	20	3	0	0	1	1	2	2	1
9096	1	7	3	21	2	0	0	1	0		2	1
9097	1	1	1	1
9097	1	1	2	2	2	0	0				0	1
9097	1	1	3	3	1	1	0	2	1	2	1	0	1	0	1
9097	1	2	1	4
9097	1	2	2	5	2	0	2				1	1
9097	1	2	3	6	1	0	0				2	1
9097	1	3	1	7	1	0	1	2	1	1	1	1
9097	1	3	2	8	1	0	0	2	1	1	1	1
9097	1	3	3	9
9097	1	4	1	10
9097	1	4	2	11
9097	1	4	3	12	1	0	1				0	1
9097	1	5	1	13
9097	1	5	2	14
9097	1	5	3	15
9097	1	6	1	16
9097	1	6	2	17
9097	1	6	3	18
9097	1	7	1	19	1	0	1	2	1	1	1	1
9097	1	7	2	20	2	1	2	2	1	1	1	1
9097	1	7	3	21
9098	1	1	1	1	4	0	0				1	1
9098	1	1	2	2	3	0	2	1	2	3	1	0	3	2	0
9098	1	1	3	3	4	3	1				2	1
9098	1	2	1	4	0	1	0	2	2	0	1	0	0	0	1
9098	1	2	2	5
9098	1	2	3	6	0	3	1	2	2	0	1	1
9098	1	3	1	7	2	1	0				0	1
9098	1	3	2	8
9098	1	3	3	9
9098	1	4	1	10	0	1	0				0	1
9098	1	4	2	11	0	1	0				1	1
9098	1	4	3	12	0	4	2	2	0		2	1
9098	1	5	1	13	2	1	0				1	1
9098	1	5	2	14	2	1	2				1	1
9098	1	5	3	15	1	0	1				2	1
9098	1	6	1	16	2	1	0	2	0		1	1
9098	1	6	2	17
9098	1	6	3	18
9098	1	7	1	19	1	1	0	1	2	2	1	0	1	0	1
9098	1	7	2	20	0	4	0	3	1	0	2	1
9098	1	7	3	21
9100	1	1	1	1	1	2	2				2	1
9100	1	1	2	2	1	1	3				0	1
9100	1	1	3	3	3	1	2				3	1
9100	1	2	1	4	2	1	2				2	1
9100	1	2	2	5	2	2	2				2	1
9100	1	2	3	6	3	2	2				3	1
9100	1	3	1	7	1	1	3				1	1
9100	1	3	2	8	1	2	3				0	1
9100	1	3	3	9	3	1	2				1	1
9100	1	4	1	10
9100	1	4	2	11	1	1	1				0	1
9100	1	4	3	12	2	1	3				1	1
9100	1	5	1	13	1	2	2				0	1
9100	1	5	2	14	2	1	1				0	1
9100	1	5	3	15	2	1	1	2	4	4	1	0	2	1	1
9100	1	6	1	16	1	1	2				0	1
9100	1	6	2	17	1	2	2				1	1
9100	1	6	3	18	2	2	3	0	3	3	3	0	2	3	2
9100	1	7	1	19	1	1	1				2	1
9100	1	7	2	20	1	1	3				3	1
9100	1	7	3	21	2	1	2	0	1	2	3	0	2	2	1
9107	1	1	1	1
9107	1	1	2	2	3	0	0	1	1	2	3	0	3	0	0
9107	1	1	3	3
9107	1	2	1	4	5	0	0	0	0		3	0	5	0	0
9107	1	2	2	5	5	0	0	1	3	3	3	0	5	0	0
9107	1	2	3	6	3	4	1	0	1	0	0	0	3	1	4
9107	1	3	1	7	3	3	2	3	5	5	2	0	3	2	3
9107	1	3	2	8	0	2	1	3	4	1	2	0	0	1	2
9107	1	3	3	9	0	2	2		3	0	2	0	0	2	2
9107	1	4	1	10	1	2	0				2	1
9107	1	4	2	11	3	0	0	2	5	5	1	1
9107	1	4	3	12	2	0	2				0	1
9107	1	5	1	13	1	2	2				2	1
9107	1	5	2	14
9107	1	5	3	15	3	2	2				0	1
9107	1	6	1	16	5	0	0	3	5	5	1	0	5	0	0
9107	1	6	2	17	3	1	2				0	1
9107	1	6	3	18
9107	1	7	1	19	3	0	0	0	0		3	0	3	0	0
9107	1	7	2	20	3	2	1				3	1
9107	1	7	3	21	2	1	2				1	1
9234	1	1	1	1	5	0	0	2	5	5	1	0	5	0	0
9234	1	1	2	2	5	0	0	2	5	5	1	0	5	0	0
9234	1	1	3	3
9234	1	2	1	4	5	0	0	2	5	5	1	0	5	0	0
9234	1	2	2	5	5	0	0				0	1
9234	1	2	3	6	5	0	0				0	1
9234	1	3	1	7
9234	1	3	2	8
9234	1	3	3	9	4	0	0				0	1
9234	1	4	1	10	5	0	0				1	1
9234	1	4	2	11	5	0	0	2	5	5	1	0	5	0	0
9234	1	4	3	12	5	0	0	2	5	5	1	0	5	0	0
9234	1	5	1	13	5	0	0	2	5	5	1	0	5	0	0
9234	1	5	2	14
9234	1	5	3	15	5	0	0	2	5	5	1	0	5	0	0
9234	1	6	1	16	5	5	0	2	5	5	1	0	5	0	5
9234	1	6	2	17	5	0	0				0	1
9234	1	6	3	18	3	1	0	1	0		0	0	3	0	1
9234	1	7	1	19	5	0	0	2	5	5	0	0	5	0	0
9234	1	7	2	20
9234	1	7	3	21	5	0	0	1	1	1	1	0	5	0	0
10001	1	1	1	1	3	1	1				2	1
10001	1	1	2	2	3	2	1				2	1
10001	1	1	3	3	2	1	1				2	1
10001	1	2	1	4
10001	1	2	2	5	3	1	1	0	1	2	2	0	3	1	1
10001	1	2	3	6	3	1	1				2	1
10001	1	3	1	7	2	2	1	1	1	1	3	0	2	1	2
10001	1	3	2	8	2	1	1				3	1
10001	1	3	3	9
10001	1	4	1	10	3	1	1				1	1
10001	1	4	2	11	3	1	1	2	4	3	3	0	3	1	1
10001	1	4	3	12	2	1	2				3	1
10001	1	5	1	13	2	1	1				2	1
10001	1	5	2	14	3	1	1				2	1
10001	1	5	3	15	3	1	1				3	1
10001	1	6	1	16
10001	1	6	2	17	3	1	0	2	3	3	3	0	3	0	1
10001	1	6	3	18	2	1	1	2	2	3	2	0	2	1	1
10001	1	7	1	19	2	1	1	1	3	2	3	0	2	1	1
10001	1	7	2	20
10001	1	7	3	21
