# Supplementary material for: How did that interaction make you feel? The relationship between quality of everyday social experiences and emotion in people with and without schizophrenia
Source: PLoS One. 2019 Sep 30;14(9):e0223003. doi: 10.1371/journal.pone.0223003 (PMC6768461; doi:10.1371/journal.pone.0223003)
Supplement: S2 File — Demographics and mean outcomes. (CSV) [file pone.0223003.s002.csv]

Subject_ID	Group	Happy_mean	Sad_mean	Anxious_mean	Intimacy_mean	MuchInteracting_mean	NoIntEMA_mean	UCLA_mean	CAINS_Motiv_mean	QLS_IR_mean	Age	Female	CurrentEmploy	YearsEdu	Married_Cohabitating	HappyWithOthers_MEAN	Percen_WithOthers	AnxiousWithOthers_MEAN	SadWithOthers_MEAN	White	Asian	Latinx	Black	MultipleEthnicities	EnjoyInteraction_Mean	SignalsAnswered
618	SZ	3.95	0	1.11	2	2.5	1.32	30	1.67	4.28571428571429	52	0	0		0	4	.105	1	0	1	0	0	0	0	4	19
626	SZ	2	.45	.55			.55	40	2.56	.714285714285714	46	1	0	14	0		0			0	1	0	0	0		11
636	SZ	1.48	1.24	1.33	1.25	1.44	2.52	38			56	0	1	13	0	1.43	.33	1.71	1.14	1	0	0	0	0	1.57	21
8016	HC	4.44	.83	.83	.88	1.5	1.35	37	.44	4.28571428571429	33	0	1	14	1	4.5	.44	1	1.63	0	0	0	1	0	3	18
8043	HC	2.36	2.5	1.64	.91	1.73	1.36	21	1.33	4.71428571428571	58	0	1	17	0	2.33	.21	1.33	3.33	0	0	0	1	0	1.33	14
8046	HC	2.81	.69	1.44	.88	3	1.13	6	1.33	3.57142857142857	35	0	0	12	0	3.13	.5	1.5	1.13	1	0	0	0	0	2.71	16
8047	HC	3.33	0	1.11	1.63	2.25	1.89	25	.11	5.5	28	1	1	22	0	3.5	.44	1	0	0	0	0	0	1	3.17	9
8053	HC	2.47	0	.16	1.5	2.5	2.32	19	.89	5	58	0	1	12	0	2.75	.21	.25	0	1	0	0	0	0	2.5	19
8055	HC	1.86	.07	.86	1.64	1.18	1.85	24	.33	5.57142857142857	28	0	1	16	0	2	.5	.43	.14	1	0	0	0	0	2.75	14
8056	HC	3.6	1	1.8	.6	2.4	1.7	27	.78	4.42857142857143	54	1	1	16	0	3.6	.5	1.8	1	1	0	0	0	0	3.4	10
8057	HC	2.87	.33	.47	0	.33	.93	7	1.67	1	59	0	1	9	0	2.33	.2	1.33	.33	1	0	0	0	0	1	15
8058	HC	2.67	0	.06	2.85	.46	2.06		.11	5.57142857142857	23	1	1	16	0	2.67	.17	0	0	0	1	0	0	0	2.67	18
8061	HC	2.72	0	0	1.67	4	1.67	21	.89	5.28571428571429	59	0	0	14	0	3	.33	0	0	1	0	0	0	0	4	18
8062	HC	3.85	.45	.1	0	5	2	20	.56	4.66666666666667	59	0	0	16	0	4	.1	0	2.5	1	0	0	0	0	3.5	20
8063	HC	5	0	0	2	3.6	2.44		0	5.85714285714286	41	0	1	14	0	5	.56	0	0	0	0	0	1	0	4	9
8064	HC	3.47	.71	.41	1.31	1.08	1.71		.56	6	28	0	1	17	0	3.27	.65	.45	.45	0	1	0	0	0	2.71	17
8606	HC	4	.06	.41	1.91	2.73	2.76	20	0	6	54	0	1	20	0	4	.53	.56	0	1	0	0	0	0	3.82	17
8607	HC	3	1.83	1.17	1.33	3	1.5	26	.33	5.85714285714286	33	1	1	17	0	3.33	.5	.67	2	1	0	0	0	0	3.67	6
9053	SZ	3.83	.83	.58	2.2	3.2	2.09	24	1.44		51	1	0	8	1	3.88	.67	.38	1.25	0	0	0	1	0	3.6	12
9054	SZ	4.2	.5	1.1	2.44	2.56	1.67	23	1	3.85714285714286	59	0	0	14	1	4.6	.5	1.2	0	0	0	1	0	0	4.25	10
9058	SZ	3.78	0	.06	2.18	1.24	2.61	14	2.56	2.14285714285714	61	0	1	9	0	3.8	.83	.07	0	1	0	0	0	0	3.2	18
9081	SZ	2.2	2	1.6	1	1.5	1.93	45	3.11	0	55	0				1	.13	2	2.5						4	15
9090	SZ	3.78	2.33	2.89	2	2.43	1.71		2.67	2.28571428571429	56	0	0	13	0	4	.67	2.83	2.33	0	1	0	0	0	3.14	9
9091	SZ	2.13	0	.25	1.9	1.9	1.38		2.56	2.85714285714286	54	0	0	12	0	2	.38	.17	0	1	0	0	0	0	2.5	16
9092	SZ	2.58	.5	1.83			1.75	34	1.33	2.33333333333333	66	0					0									12
9093	SZ	2.59	.47	.53	1.44	2.67	1.67		1	4.71428571428571	55	0	0	14	1	2.33	.53	.33	.56	0	0	0	0	1	3.86	17
9094	SZ	2.11	1.06	.72	1	.8	2.44	37	1.22	2.42857142857143	64	1	0	18	0	2	.06	1	2	0	1	0	0	0	2.5	18
9095	SZ	.5	1.13	.38	.5	.5	2.5	47	3.78	.428571428571429	40	1	0	18	0	1	.25	.5	0	0	1	0	0	0	1	8
9096	SZ	2.84	.42	.47	.83	1.11	2		1.56	1	39	0	1	18	0	2.7	.53	.6	.3	0	0	0	1	0	2.09	19
9097	SZ	1.33	.22	.78	2	1	.89		1.89	.285714285714286	49	1	0	16	0	1	.11	0	1	0	1	0	0	0	1.2	9
9098	SZ	1.4	1.47	.6	1.86	1.29	1.13		1.78	4.42857142857143	45	0				1.33	.2	.67	.67						1	15
9100	SZ	1.65	1.35	2.1	.67	2.67	1.4	31	1.56	2.57142857142857	49	0	0	13	0	2	.15	2	1.33	1	0	0	0	0	3	20
9107	SZ	2.65	1.24	1	1.44	2.7	1.65	22	2		47	0	1	18	0	3	.53	.67	1.22	0	1	0	0	0	2.63	17
9234	SZ	4.81	.38	0	1.82	4.18	.63	38	1.78	3	57	0	0	13	0	4.82	.69	0	.55	0	0	0	1	0	4.6	16
10001	SZ	2.56	1.13	1	1.33	2.33	2.37	41			65	0	1	14	0	2.5	.38	.83	1.17	1	0	0	0	0	2.33	16
